# Supplementary material
Source: publisher figshare collection journal article supplement (https://acs.figshare.com/ndownloader/files/4468468)
Supplement: Supplementary file 1 [file 4468468]

**Supporting Information for**

**Lignans from the Tuber-barks of *Colocasia antiquorum* var. *esculenta* and  
Their Anti-melanogenic Activity**

KI HYUN KIM,<sup>†</sup> EUNJUNG MOON,<sup>‡</sup> SUN YEOU KIM,<sup>‡</sup> AND KANG RO LEE<sup>\*,†</sup>

<sup>†</sup>Natural Products Laboratory, School of Pharmacy, Sungkyunkwan University, Suwon 440-746, Korea, and <sup>‡</sup>East-West Medical Science Integrated Research Center, Graduate School of East-West Medical Science, Kyung Hee University, Yongin 449-701, Korea

\*To whom correspondence should be addressed: School of Pharmacy, Sungkyunkwan University, Suwon 440-746, Korea. Tel: +82-31-290-7710. Fax: +82-31-290-7730. E-mail: krlee@skku.ac.kr.

**Supporting Information Contents:**

**Figure 1.** The structures of known compounds (**9-12**)

**Figure 2.** The  $^1\text{H}$  NMR ( $\text{CD}_3\text{OD}$ , 500 MHz) data of **1**

**Figure 3.** The  $^{13}\text{C}$  NMR ( $\text{CD}_3\text{OD}$ , 125 MHz) data of **1**

**Figure 4.**  $^1\text{H}$ - $^1\text{H}$  COSY data of **1**

**Figure 5.** HSQC data of **1**

**Figure 6.** HMBC data of **1**

**Figure 7.** The  $^1\text{H}$  NMR ( $\text{CD}_3\text{OD}$ , 500 MHz) data of **2**

**Figure 8.** The  $^{13}\text{C}$  NMR ( $\text{CD}_3\text{OD}$ , 125 MHz) data of **2**

**Figure 9.**  $^1\text{H}$ - $^1\text{H}$  COSY data of **2**

**Figure 10.** HSQC data of **2**

**Figure 11.** HMBC data of **2**

The chemical structure shows a quercetin molecule with two glucose units attached at the 6 and 8 positions. The glucose units are in the beta-pyranose form. The quercetin core consists of a chromone ring system with a ketone group at position 4 and a double bond at position 2. The glucose units are attached to the 6 and 8 positions of the chromone ring via beta-glycosidic bonds.

O=C(O)/C=C/c1ccccc1

The chemical structure of Steroid 10 is a complex polycyclic molecule. It features a steroid nucleus with a hydroxyl group (HO-) at the 3-position. The structure includes several methyl groups (CH<sub>3</sub>) and a side chain at the 17-position. Stereochemistry is indicated by wedges and dashes: the hydroxyl group is dashed, the methyl group at C-10 is wedged, the methyl group at C-13 is dashed, the methyl group at C-14 is wedged, and the side chain at C-17 is dashed. The side chain is a 2-methylbutyl group.

COc1cc(O)ccc1/C=C/C(=O)NCCc1ccc(O)cc1

S3

**Figure 2.** The  $^1\text{H}$  NMR ( $\text{CD}_3\text{OD}$ , 500 MHz) data of **1**

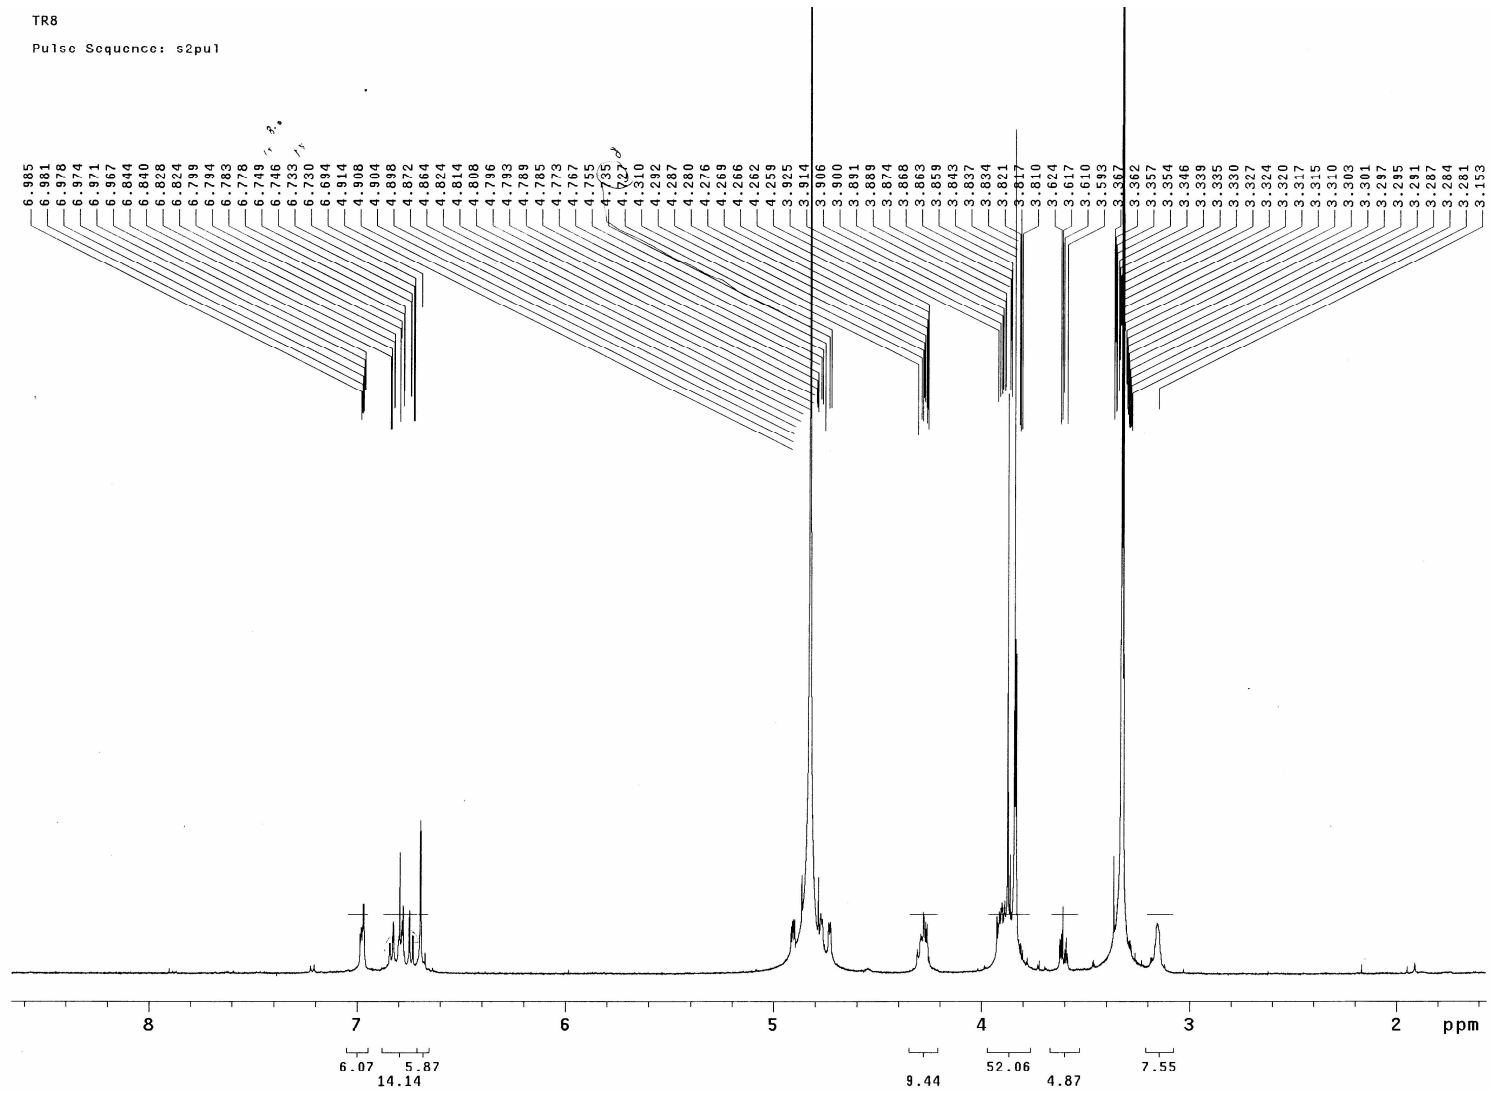



**Figure 3.** The  $^{13}\text{C}$  NMR ( $\text{CD}_3\text{OD}$ , 125 MHz) data of **1**

TR8-13c

Pulse Sequence: s2pu1

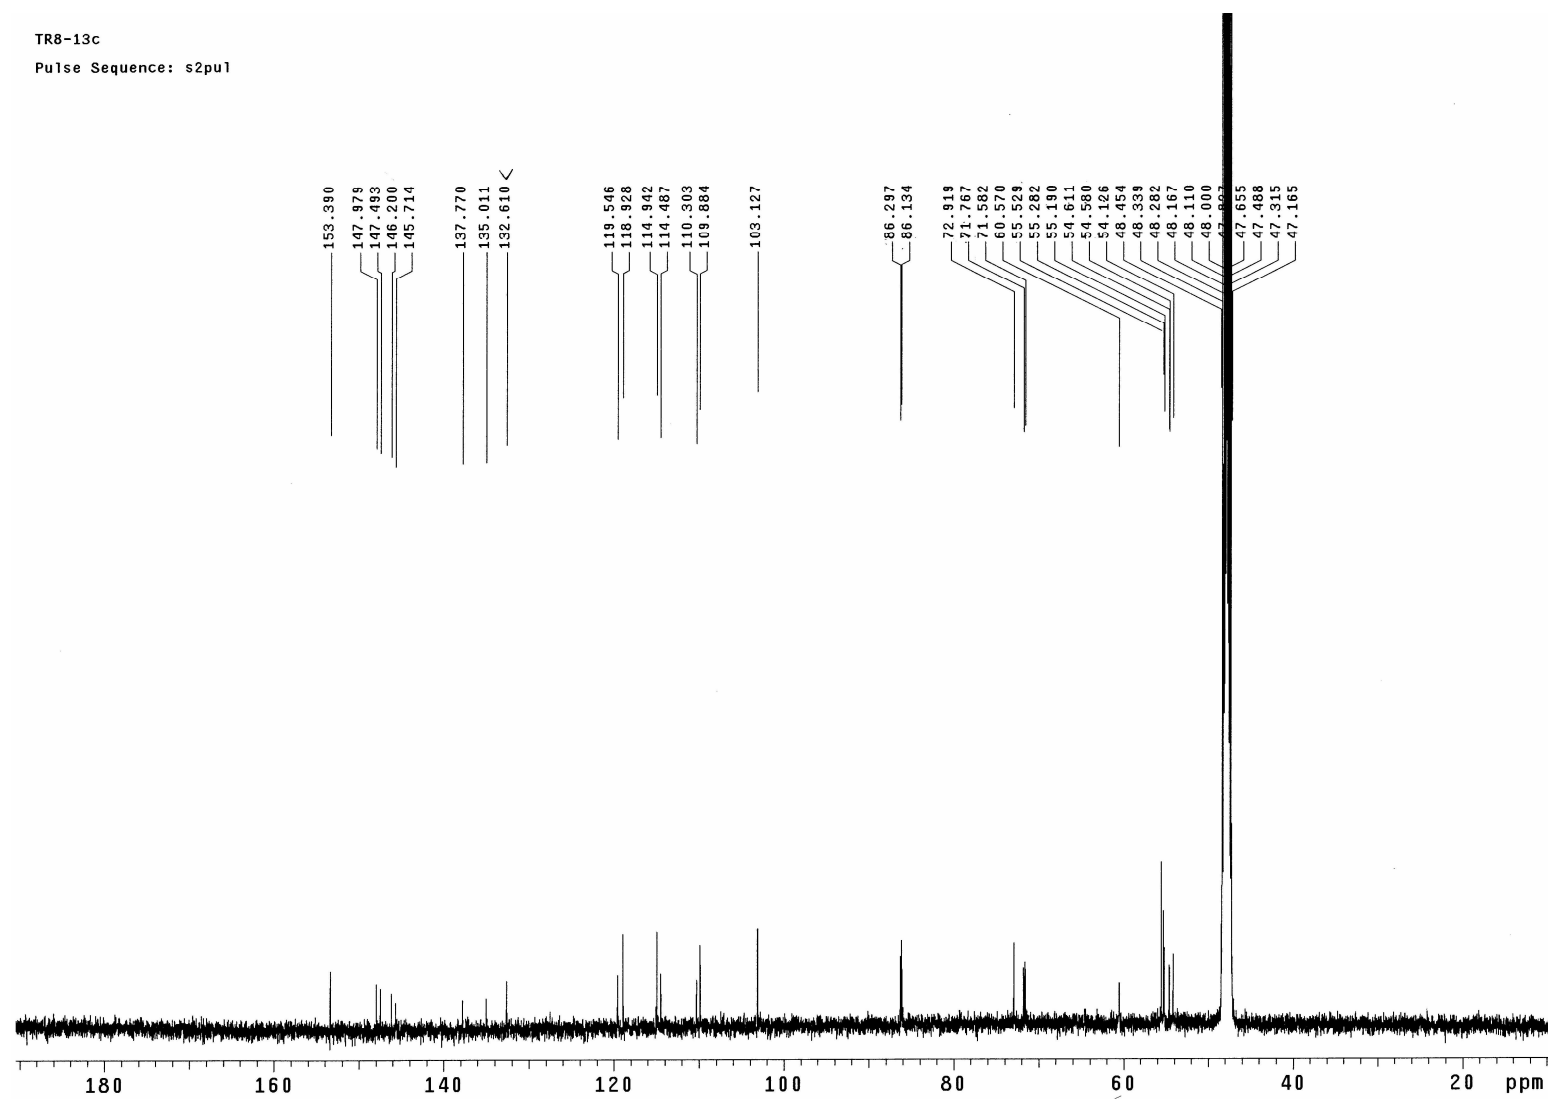

**Figure 4.**  $^1\text{H}$ - $^1\text{H}$  COSY data of **1**

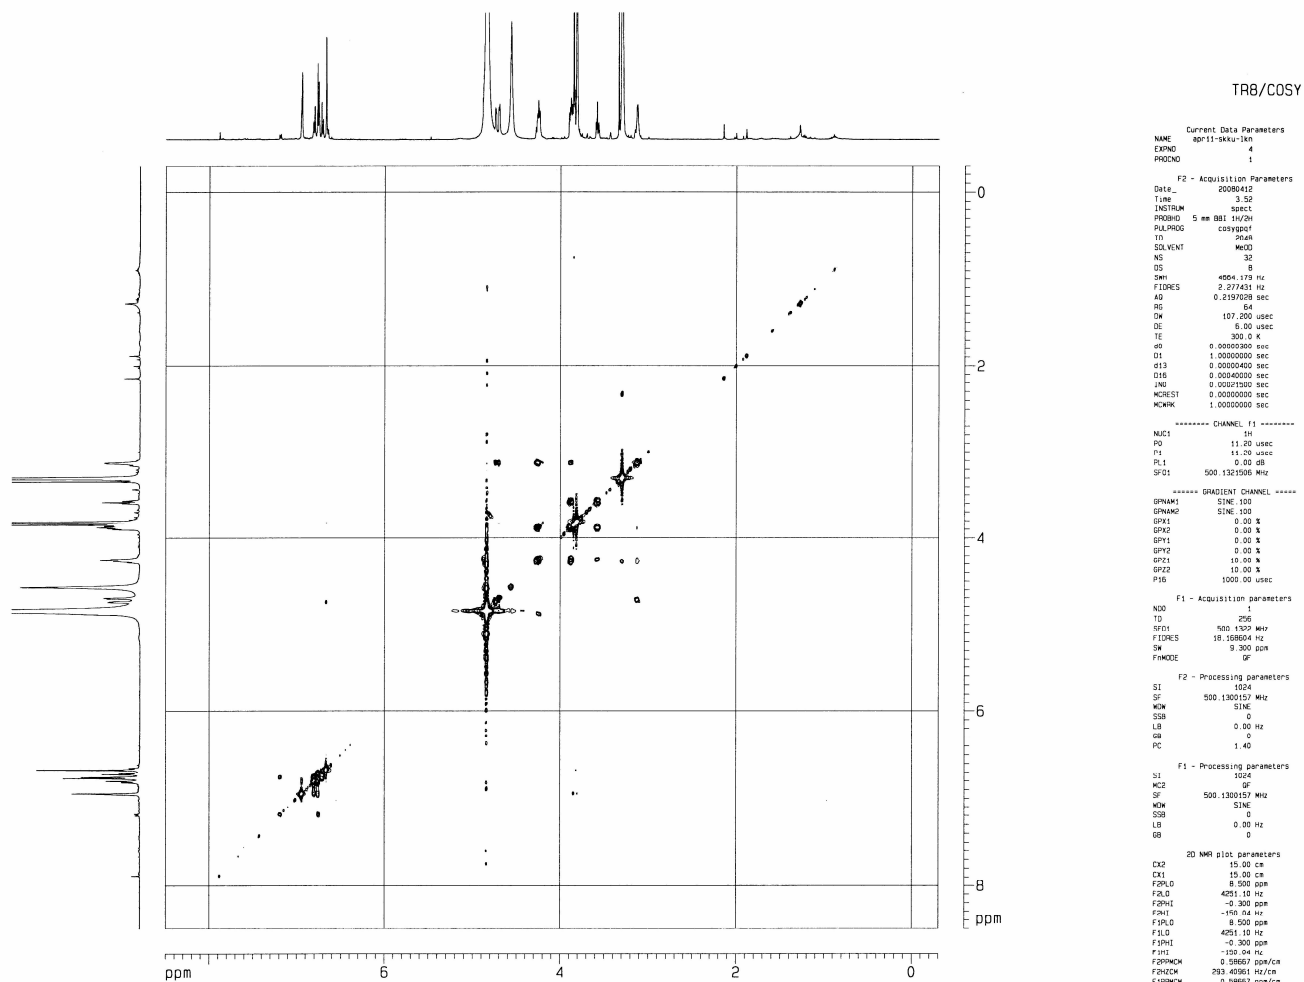

Figure 5. HSQC data of 1

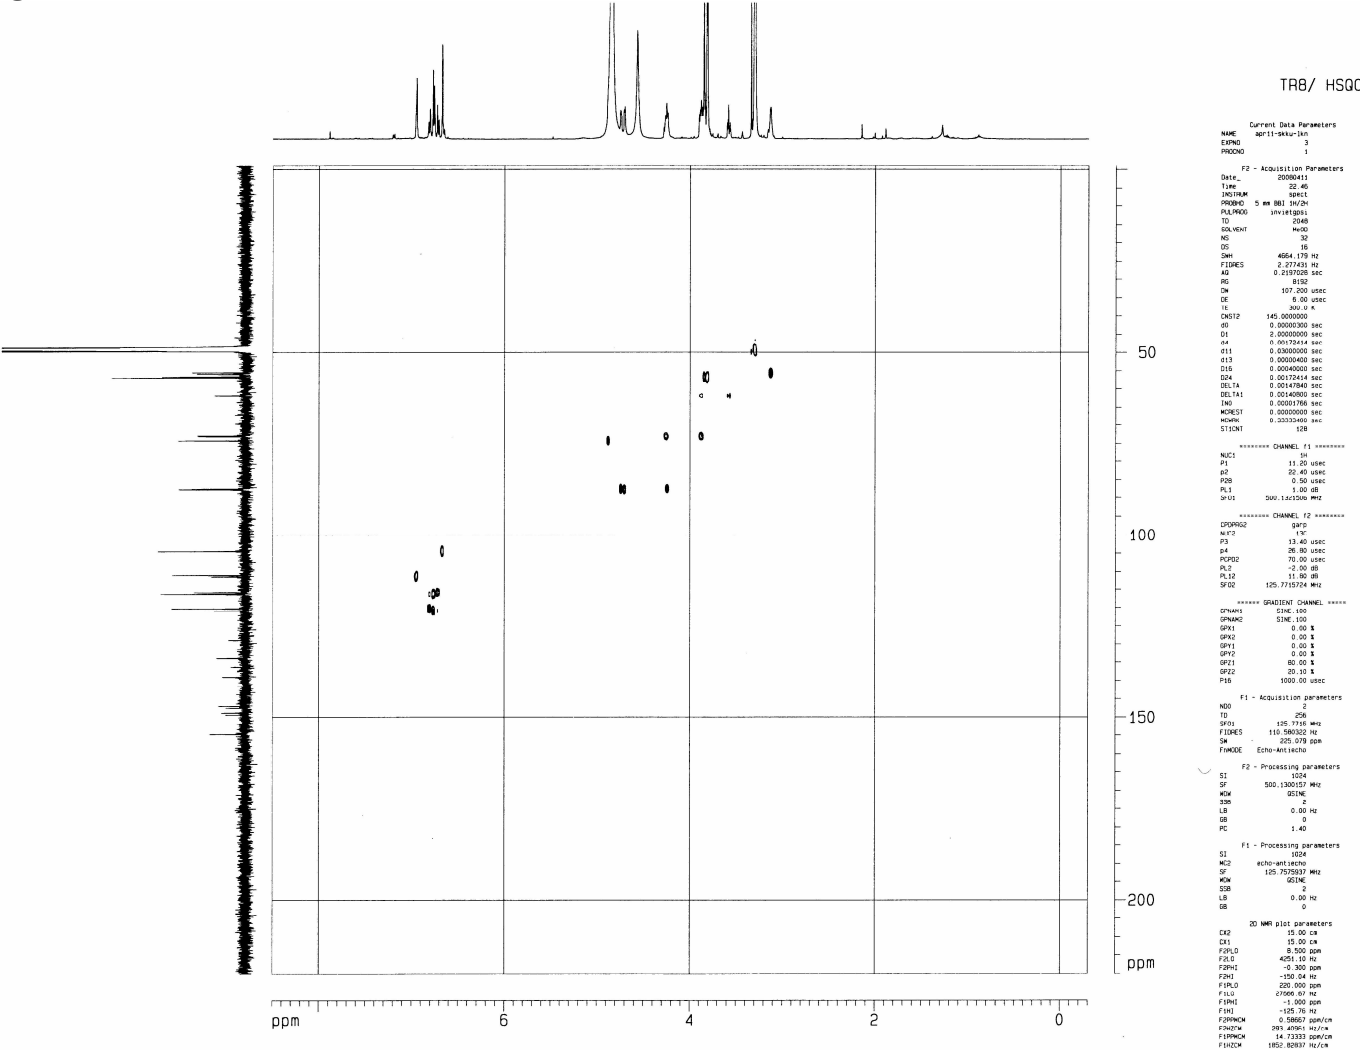

Figure 6. HMBC data of 1

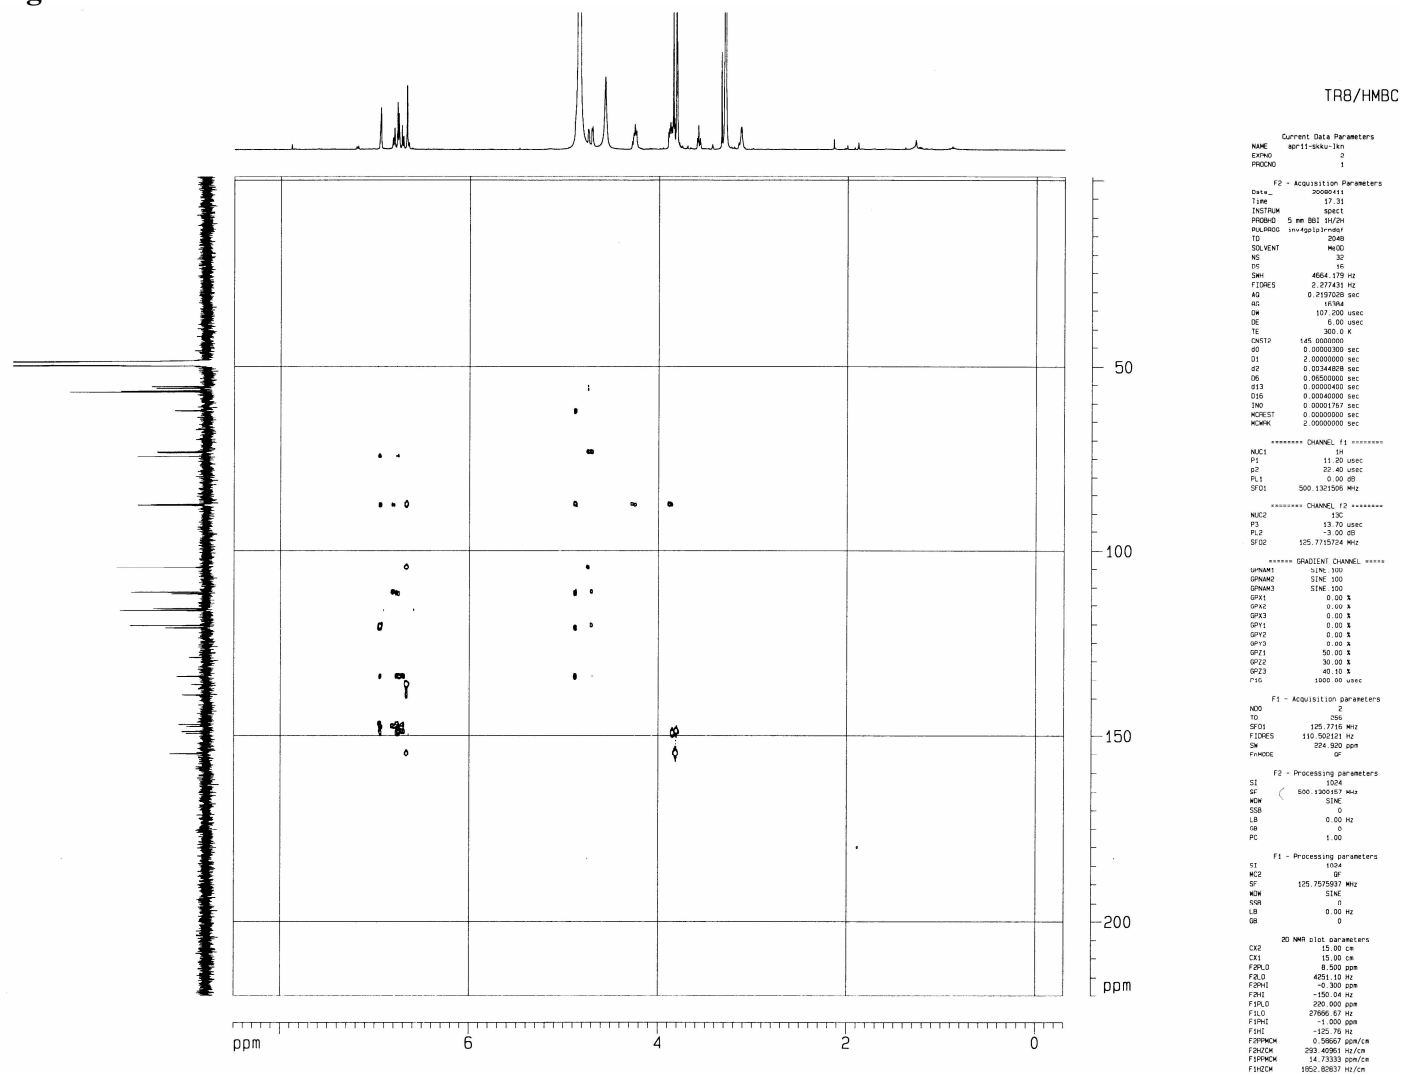

**Figure 7.** The  $^1\text{H}$  NMR ( $\text{CD}_3\text{OD}$ , 500 MHz) data of **2**

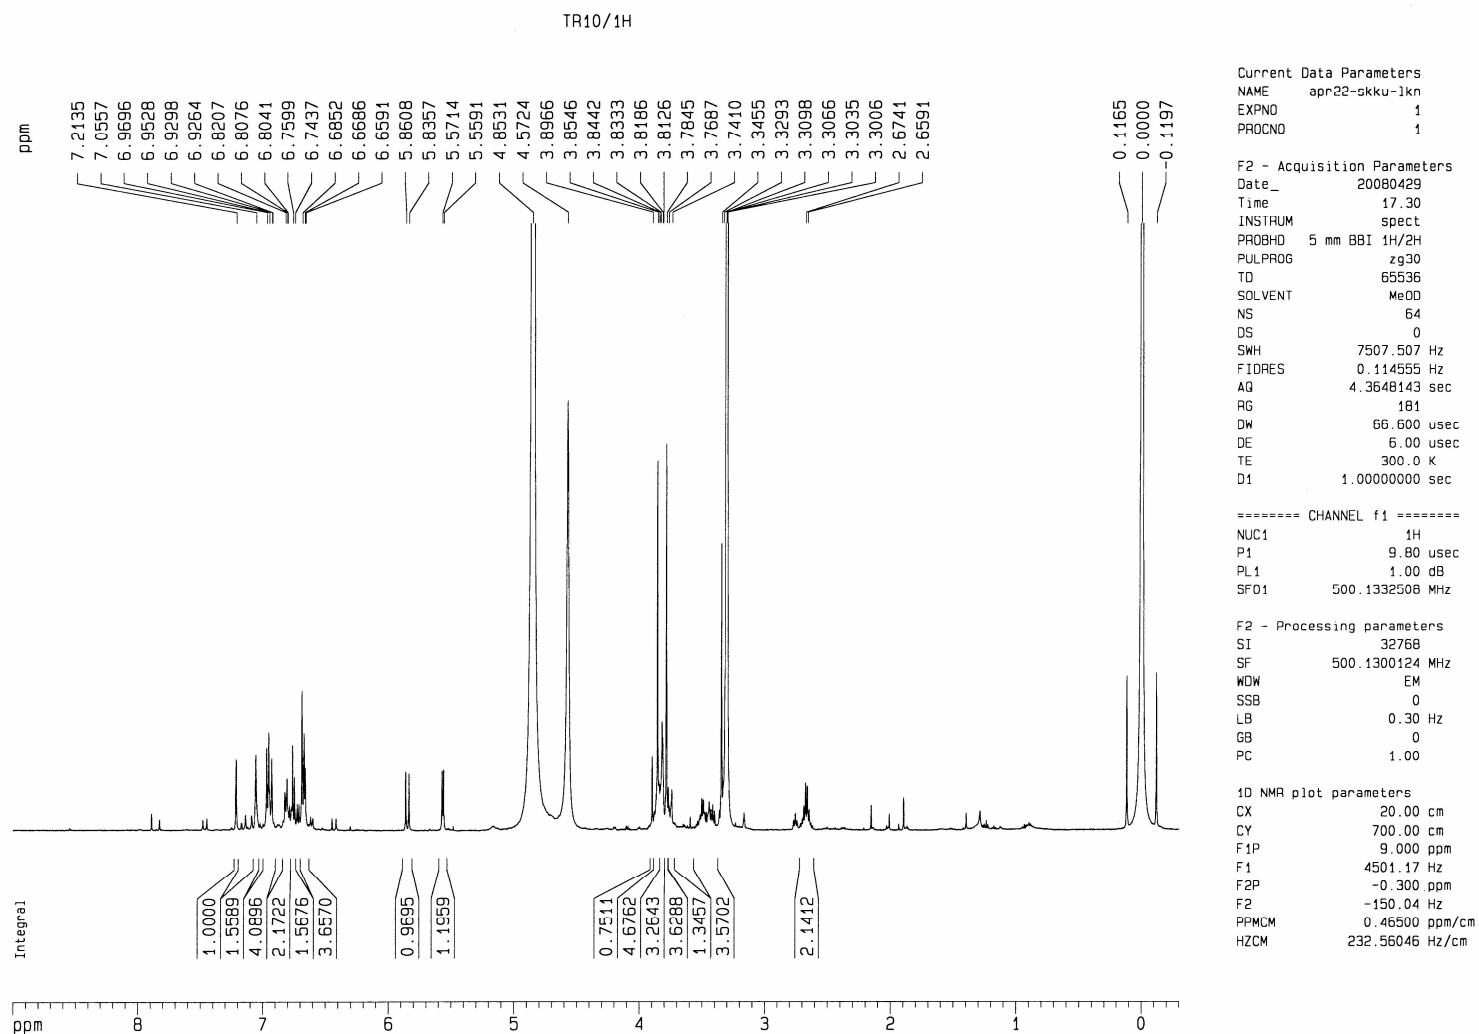

**Figure 8.** The  $^{13}\text{C}$  NMR ( $\text{CD}_3\text{OD}$ , 125 MHz) data of **2**

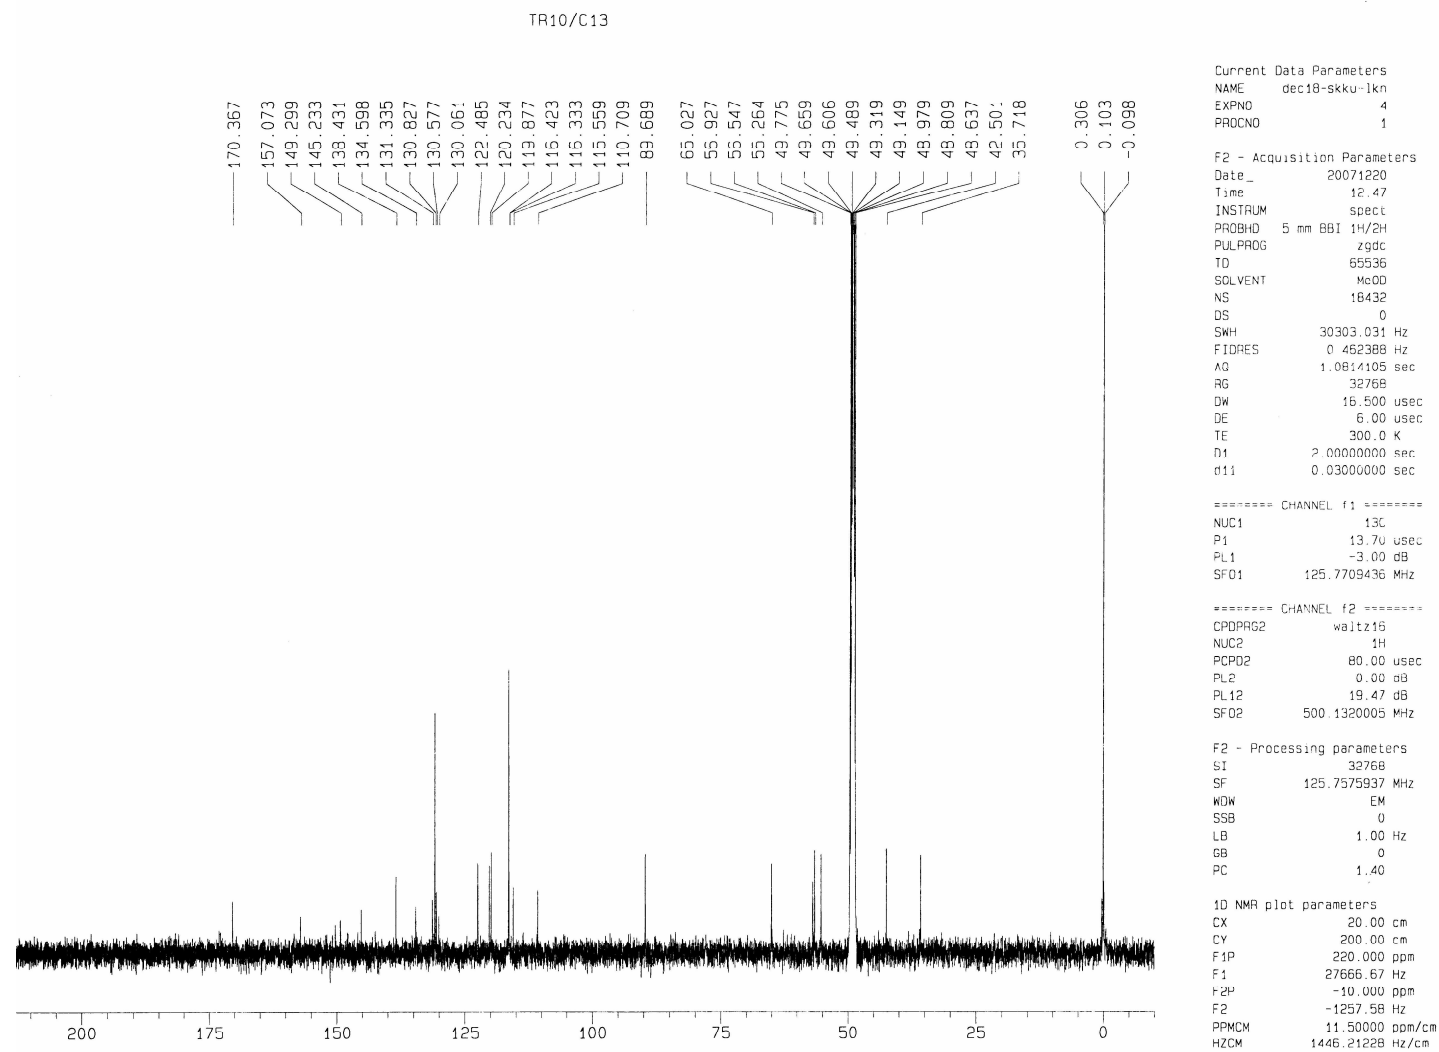

**Figure 9.**  $^1\text{H}$ - $^1\text{H}$  COSY data of **2**

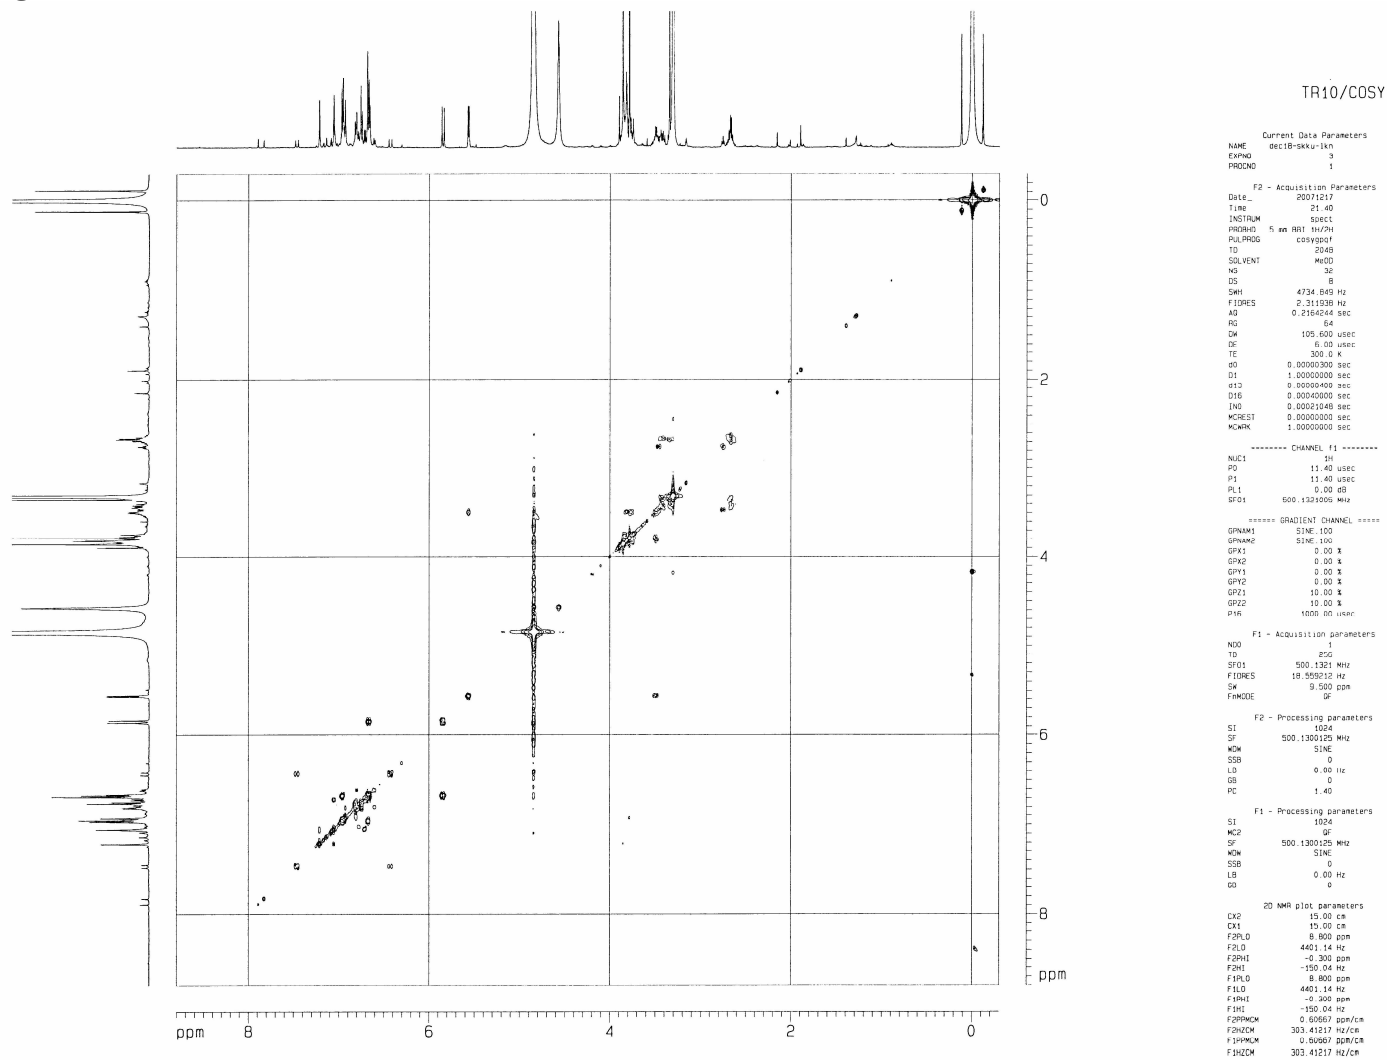

**Figure 10.** HSQC data of **2**

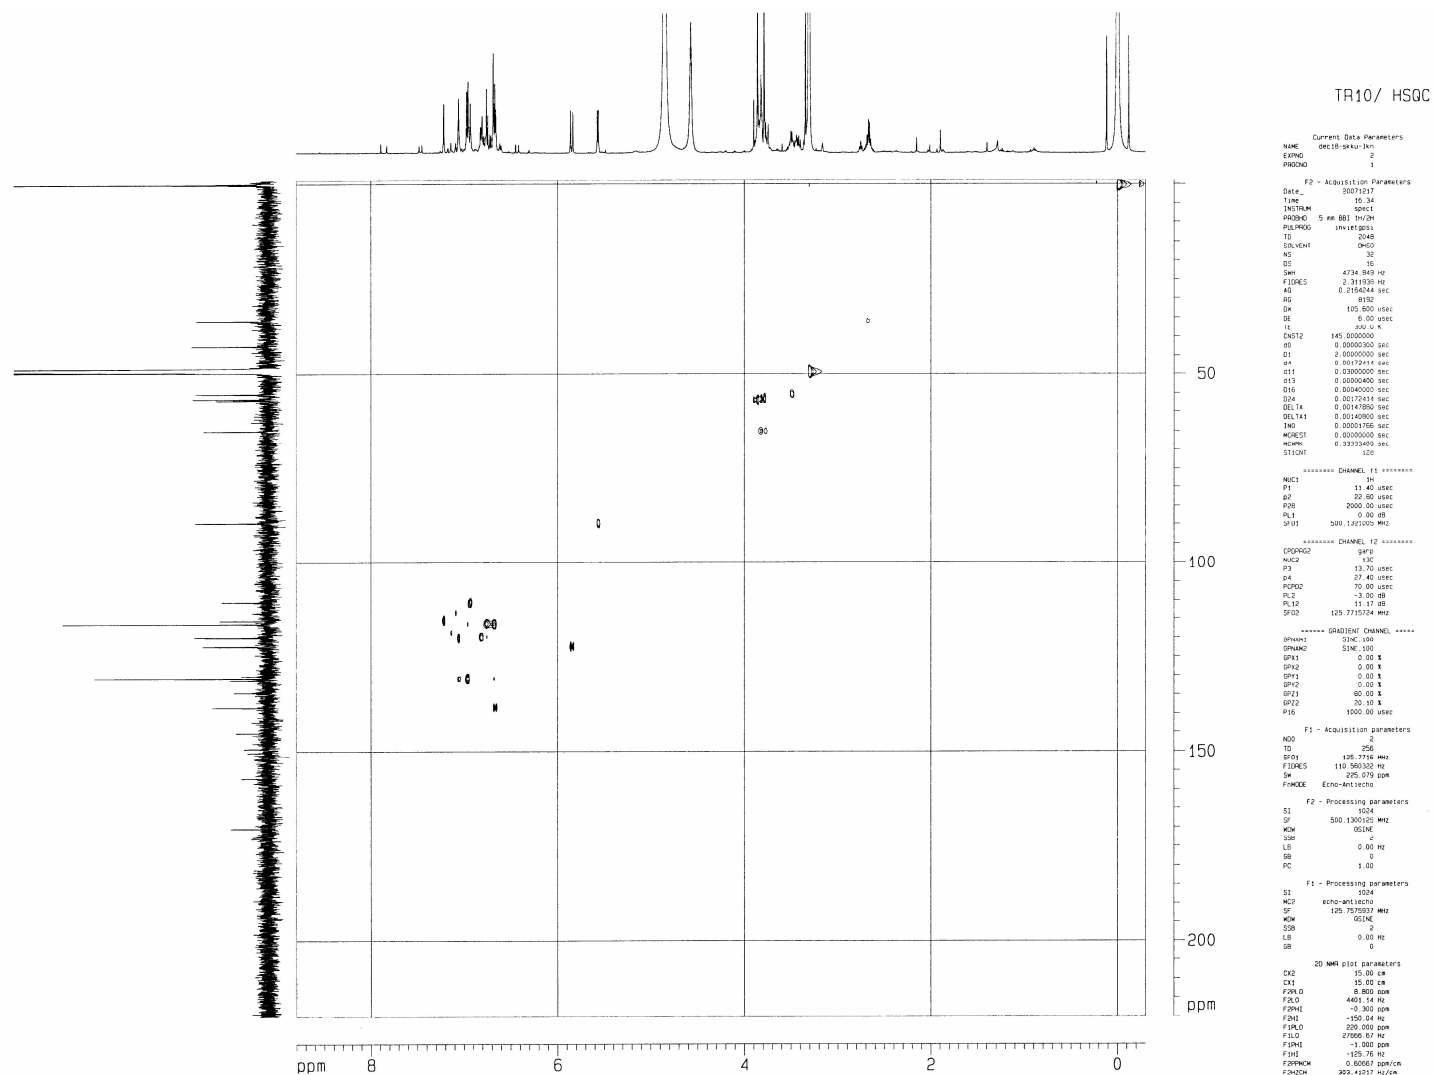



TR10/HMBC

Current Data Parameters

NAME apr22-saku-1sh  
EXPNO 2  
PROCNO 1

F2 - Acquisition Parameters

DATE\_ 20060429  
TIME 17.30  
INSTRUM spect  
PROBHD 5 mm BBI 1H/2H  
PULPROG invgpgpr1dprg1  
TD 65536  
SOLVENT MeOD  
NS 32  
DS 16  
SWH 4595.508 Hz  
FIDRES 2.143040 Hz  
AQ 0.2229812 sec  
RG 16384  
CW 106.800 usec  
DE 6.00 usec  
TE 300.2 K  
CNS2 145.000000  
D0 0.0000000 sec  
D1 2.0000000 sec  
d2 0.00344808 sec  
D6 0.0000000 sec  
d13 0.00000400 sec  
D16 0.00040000 sec  
TMO 0.0001767 sec  
MKES1 0.0000000 sec  
MKES2 2.0000000 sec

\*\*\*\*\* CHANNEL f1 \*\*\*\*\*

NUC1 1H  
P1 11.30 usec  
PC 12.00 usec  
PL1 0.00 dB  
SF01 500.1300000 MHz

\*\*\*\*\* CHANNEL f2 \*\*\*\*\*

NUC2 13C  
P2 13.70 usec  
PC 3.00 dB  
SF02 125.7715724 MHz

\*\*\*\*\* GRADIENT CHANNEL \*\*\*\*\*

GP0A01 SINC 100  
GP0A02 SINC 100  
K1C1 100  
K1C2 100  
GPR1 0.00 %  
GPR2 0.00 %  
GPR3 0.00 %  
GPR4 0.00 %  
GPR5 0.00 %  
GPR6 0.00 %  
GPR7 0.00 %  
GPR8 0.00 %  
GPR9 0.00 %  
GPR10 0.00 %  
GPR11 0.00 %  
GPR12 0.00 %  
GPR13 0.00 %  
GPR14 0.00 %  
GPR15 0.00 %  
GPR16 0.00 %  
GPR17 0.00 %  
GPR18 0.00 %  
GPR19 0.00 %  
GPR20 0.00 %  
GPR21 0.00 %  
GPR22 0.00 %  
GPR23 0.00 %  
GPR24 0.00 %  
GPR25 0.00 %  
GPR26 0.00 %  
GPR27 0.00 %  
GPR28 0.00 %  
GPR29 0.00 %  
GPR30 0.00 %  
GPR31 0.00 %  
GPR32 0.00 %  
GPR33 0.00 %  
GPR34 0.00 %  
GPR35 0.00 %  
GPR36 0.00 %  
GPR37 0.00 %  
GPR38 0.00 %  
GPR39 0.00 %  
GPR40 0.00 %  
GPR41 0.00 %  
GPR42 0.00 %  
GPR43 0.00 %  
GPR44 0.00 %  
GPR45 0.00 %  
GPR46 0.00 %  
GPR47 0.00 %  
GPR48 0.00 %  
GPR49 0.00 %  
GPR50 0.00 %  
GPR51 0.00 %  
GPR52 0.00 %  
GPR53 0.00 %  
GPR54 0.00 %  
GPR55 0.00 %  
GPR56 0.00 %  
GPR57 0.00 %  
GPR58 0.00 %  
GPR59 0.00 %  
GPR60 0.00 %  
GPR61 0.00 %  
GPR62 0.00 %  
GPR63 0.00 %  
GPR64 0.00 %  
GPR65 0.00 %  
GPR66 0.00 %  
GPR67 0.00 %  
GPR68 0.00 %  
GPR69 0.00 %  
GPR70 0.00 %  
GPR71 0.00 %  
GPR72 0.00 %  
GPR73 0.00 %  
GPR74 0.00 %  
GPR75 0.00 %  
GPR76 0.00 %  
GPR77 0.00 %  
GPR78 0.00 %  
GPR79 0.00 %  
GPR80 0.00 %  
GPR81 0.00 %  
GPR82 0.00 %  
GPR83 0.00 %  
GPR84 0.00 %  
GPR85 0.00 %  
GPR86 0.00 %  
GPR87 0.00 %  
GPR88 0.00 %  
GPR89 0.00 %  
GPR90 0.00 %  
GPR91 0.00 %  
GPR92 0.00 %  
GPR93 0.00 %  
GPR94 0.00 %  
GPR95 0.00 %  
GPR96 0.00 %  
GPR97 0.00 %  
GPR98 0.00 %  
GPR99 0.00 %  
GPR100 0.00 %  
GPR101 0.00 %  
GPR102 0.00 %  
GPR103 0.00 %  
GPR104 0.00 %  
GPR105 0.00 %  
GPR106 0.00 %  
GPR107 0.00 %  
GPR108 0.00 %  
GPR109 0.00 %  
GPR110 0.00 %  
GPR111 0.00 %  
GPR112 0.00 %  
GPR113 0.00 %  
GPR114 0.00 %  
GPR115 0.00 %  
GPR116 0.00 %  
GPR117 0.00 %  
GPR118 0.00 %  
GPR119 0.00 %  
GPR120 0.00 %  
GPR121 0.00 %  
GPR122 0.00 %  
GPR123 0.00 %  
GPR124 0.00 %  
GPR125 0.00 %  
GPR126 0.00 %  
GPR127 0.00 %  
GPR128 0.00 %  
GPR129 0.00 %  
GPR130 0.00 %  
GPR131 0.00 %  
GPR132 0.00 %  
GPR133 0.00 %  
GPR134 0.00 %  
GPR135 0.00 %  
GPR136 0.00 %  
GPR137 0.00 %  
GPR138 0.00 %  
GPR139 0.00 %  
GPR140 0.00 %  
GPR141 0.00 %  
GPR142 0.00 %  
GPR143 0.00 %  
GPR144 0.00 %  
GPR145 0.00 %  
GPR146 0.00 %  
GPR147 0.00 %  
GPR148 0.00 %  
GPR149 0.00 %  
GPR150 0.00 %  
GPR151 0.00 %  
GPR152 0.00 %  
GPR153 0.00 %  
GPR154 0.00 %  
GPR155 0.00 %  
GPR156 0.00 %  
GPR157 0.00 %  
GPR158 0.00 %  
GPR159 0.00 %  
GPR160 0.00 %  
GPR161 0.00 %  
GPR162 0.00 %  
GPR163 0.00 %  
GPR164 0.00 %  
GPR165 0.00 %  
GPR166 0.00 %  
GPR167 0.00 %  
GPR168 0.00 %  
GPR169 0.00 %  
GPR170 0.00 %  
GPR171 0.00 %  
GPR172 0.00 %  
GPR173 0.00 %  
GPR174 0.00 %  
GPR175 0.00 %  
GPR176 0.00 %  
GPR177 0.00 %  
GPR178 0.00 %  
GPR179 0.00 %  
GPR180 0.00 %  
GPR181 0.00 %  
GPR182 0.00 %  
GPR183 0.00 %  
GPR184 0.00 %  
GPR185 0.00 %  
GPR186 0.00 %  
GPR187 0.00 %  
GPR188 0.00 %  
GPR189 0.00 %  
GPR190 0.00 %  
GPR191 0.00 %  
GPR192 0.00 %  
GPR193 0.00 %  
GPR194 0.00 %  
GPR195 0.00 %  
GPR196 0.00 %  
GPR197 0.00 %  
GPR198 0.00 %  
GPR199 0.00 %  
GPR200 0.00 %  
GPR201 0.00 %  
GPR202 0.00 %  
GPR203 0.00 %  
GPR204 0.00 %  
GPR205 0.00 %  
GPR206 0.00 %  
GPR207 0.00 %  
GPR208 0.00 %  
GPR209 0.00 %  
GPR210 0.00 %  
GPR211 0.00 %  
GPR212 0.00 %  
GPR213 0.00 %  
GPR214 0.00 %  
GPR215 0.00 %  
GPR216 0.00 %  
GPR217 0.00 %  
GPR218 0.00 %  
GPR219 0.00 %  
GPR220 0.00 %  
GPR221 0.00 %  
GPR222 0.00 %  
GPR223 0.00 %  
GPR224 0.00 %  
GPR225 0.00 %  
GPR226 0.00 %  
GPR227 0.00 %  
GPR228 0.00 %  
GPR229 0.00 %  
GPR230 0.00 %  
GPR231 0.00 %  
GPR232 0.00 %  
GPR233 0.00 %  
GPR234 0.00 %  
GPR235 0.00 %  
GPR236 0.00 %  
GPR237 0.00 %  
GPR238 0.00 %  
GPR239 0.00 %  
GPR240 0.00 %  
GPR241 0.00 %  
GPR242 0.00 %  
GPR243 0.00 %  
GPR244 0.00 %  
GPR245 0.00 %  
GPR246 0.00 %  
GPR247 0.00 %  
GPR248 0.00 %  
GPR249 0.00 %  
GPR250 0.00 %  
GPR251 0.00 %  
GPR252 0.00 %  
GPR253 0.00 %  
GPR254 0.00 %  
GPR255 0.00 %  
GPR256 0.00 %<
